# Supplementary material
Source: PubMed Central journal article supplement (PMC1311572)

Figure I

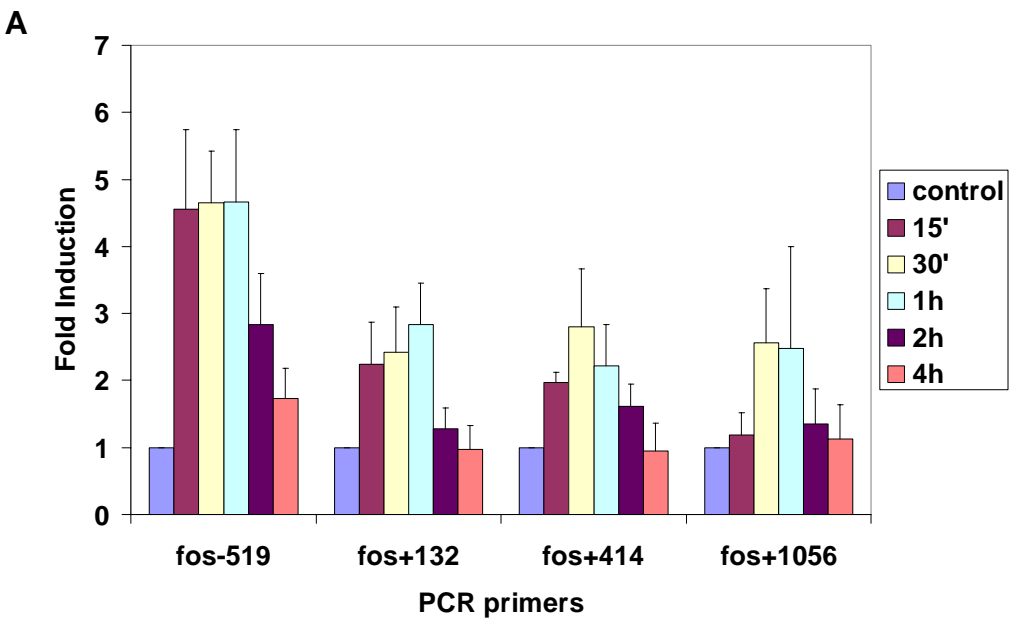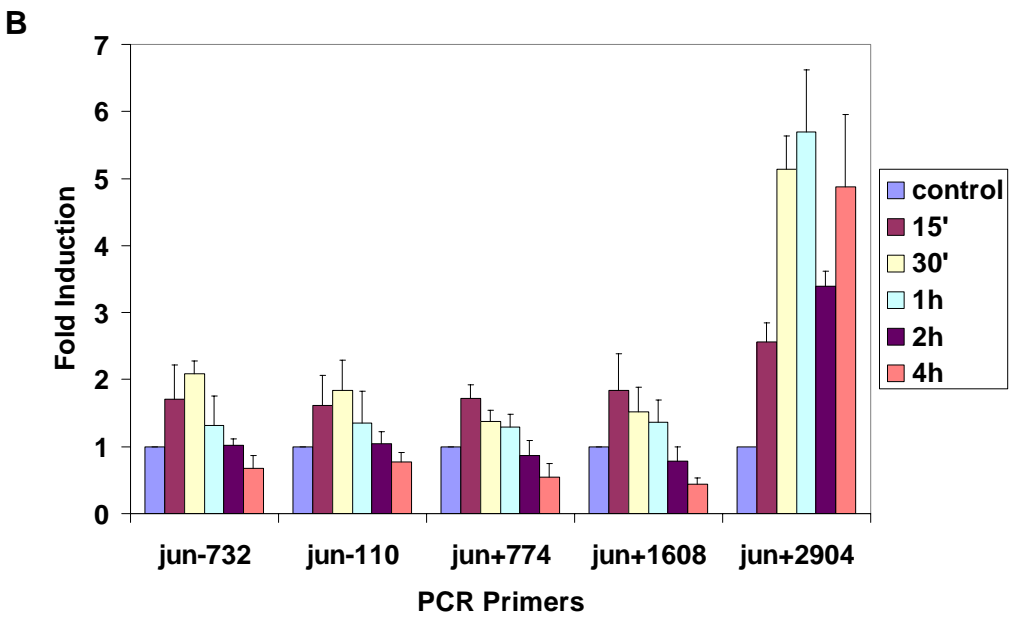

Supplement: pbio.0030393.sg001.pdf [file pbio.0030393.sg001.pdf]

**Figure III**

**A**

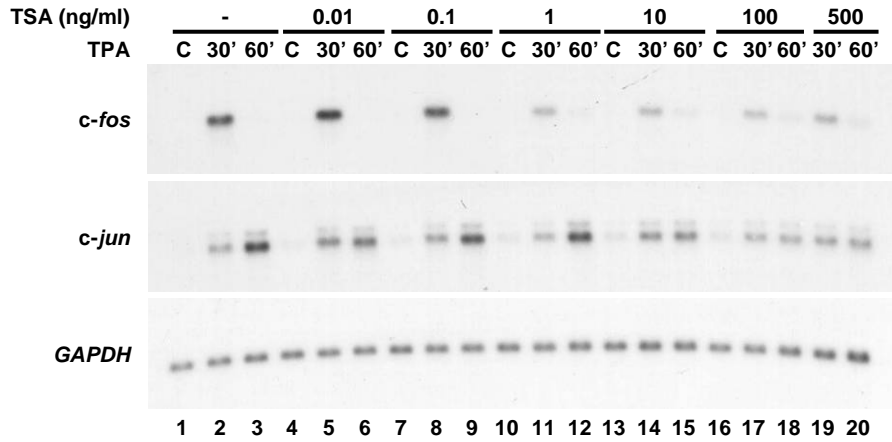

**B**

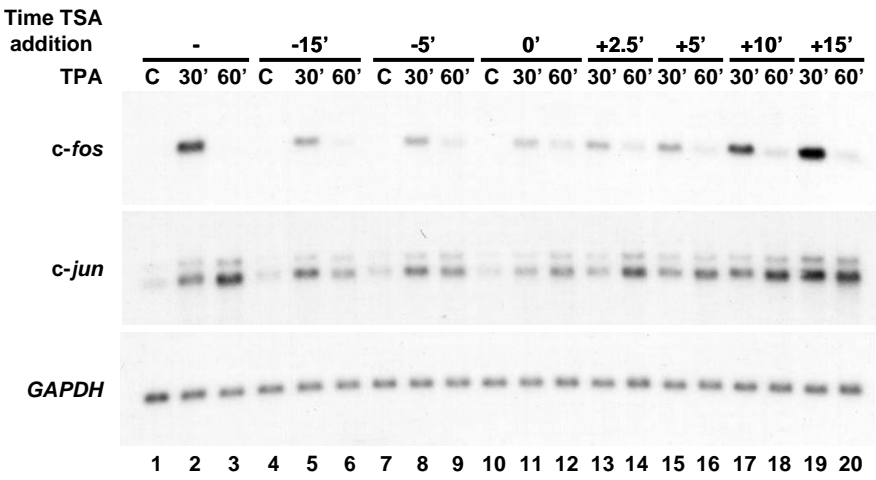

Supplement: pbio.0030393.sg003.pdf [file pbio.0030393.sg003.pdf]

**Figure IV**

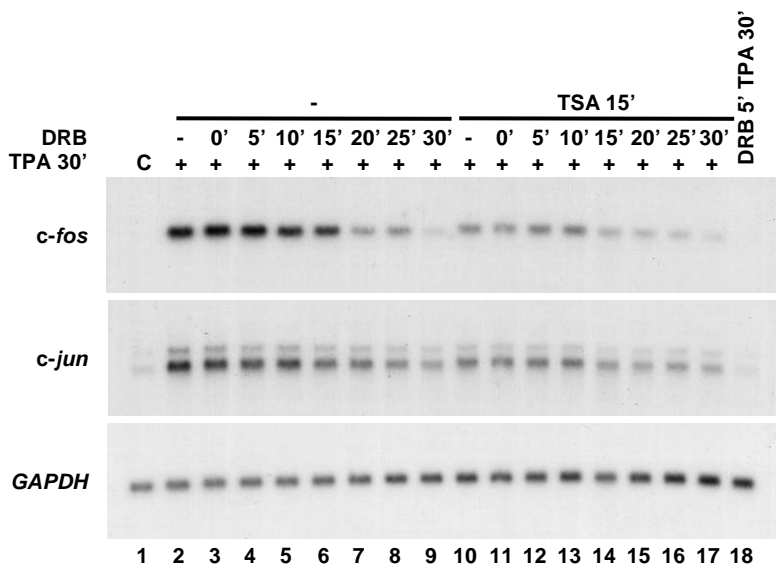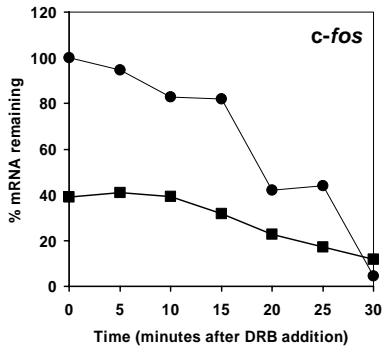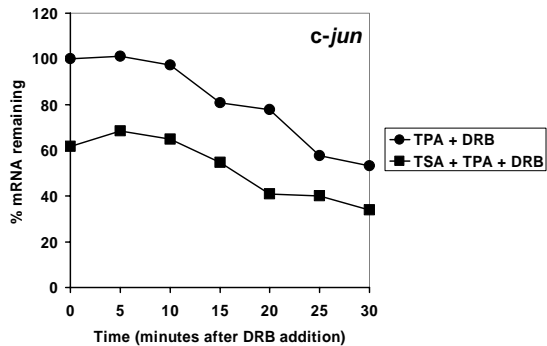

**(i)**

**(ii)**

Supplement: pbio.0030393.sg004.pdf [file pbio.0030393.sg004.pdf]

Figure V

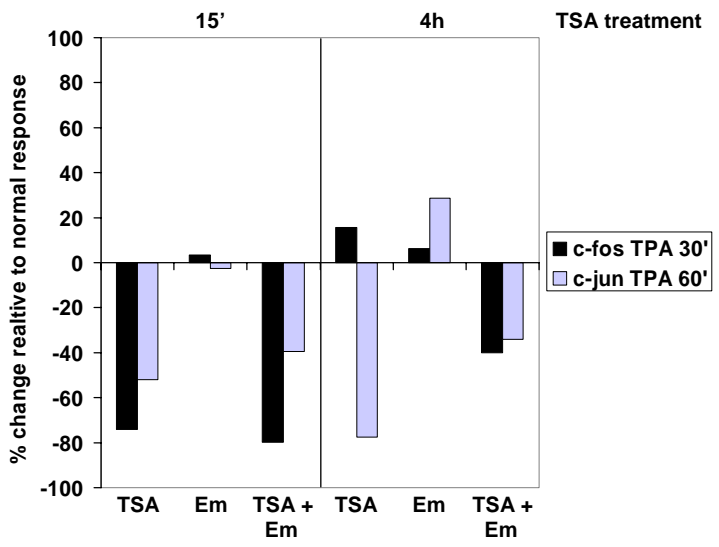

Supplement: pbio.0030393.sg005.pdf [file pbio.0030393.sg005.pdf]

**Figure VI**

**A**

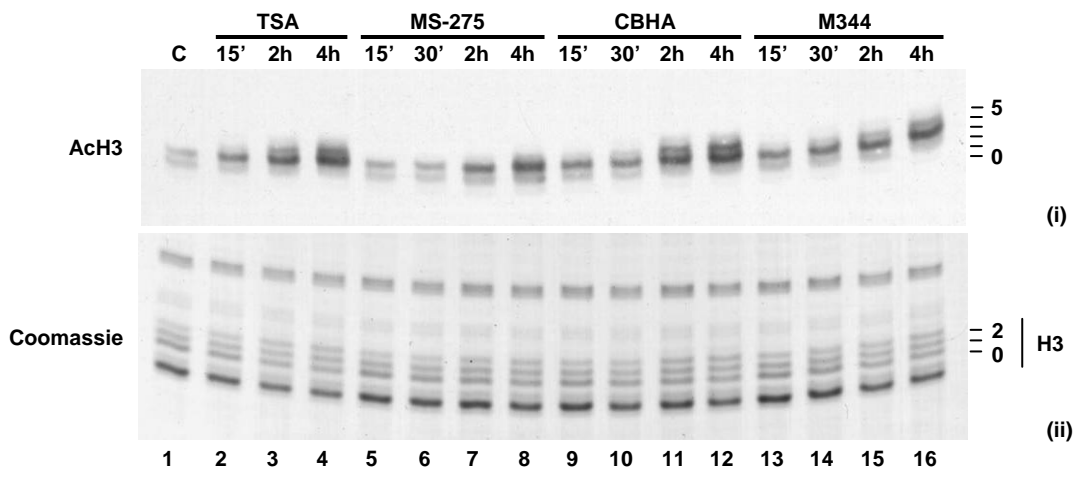

**B**

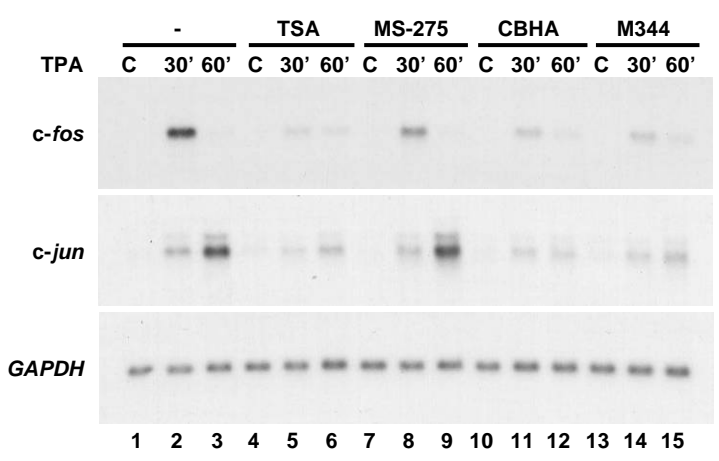

Supplement: pbio.0030393.sg006.pdf [file pbio.0030393.sg006.pdf]
